# Supplementary material for: Design, synthesis, and in vitro antiproliferative activity of novel 4-amino-6-phenoxyquinoline and 4,6-diphenoxyquinoline
Source: Royal Society of Chemistry journal article supplement (doi:10.1039/d6ra01045h), 2026-04-30
Supplement: d6ra01045h2.pdf [file d6ra01045h2.pdf]

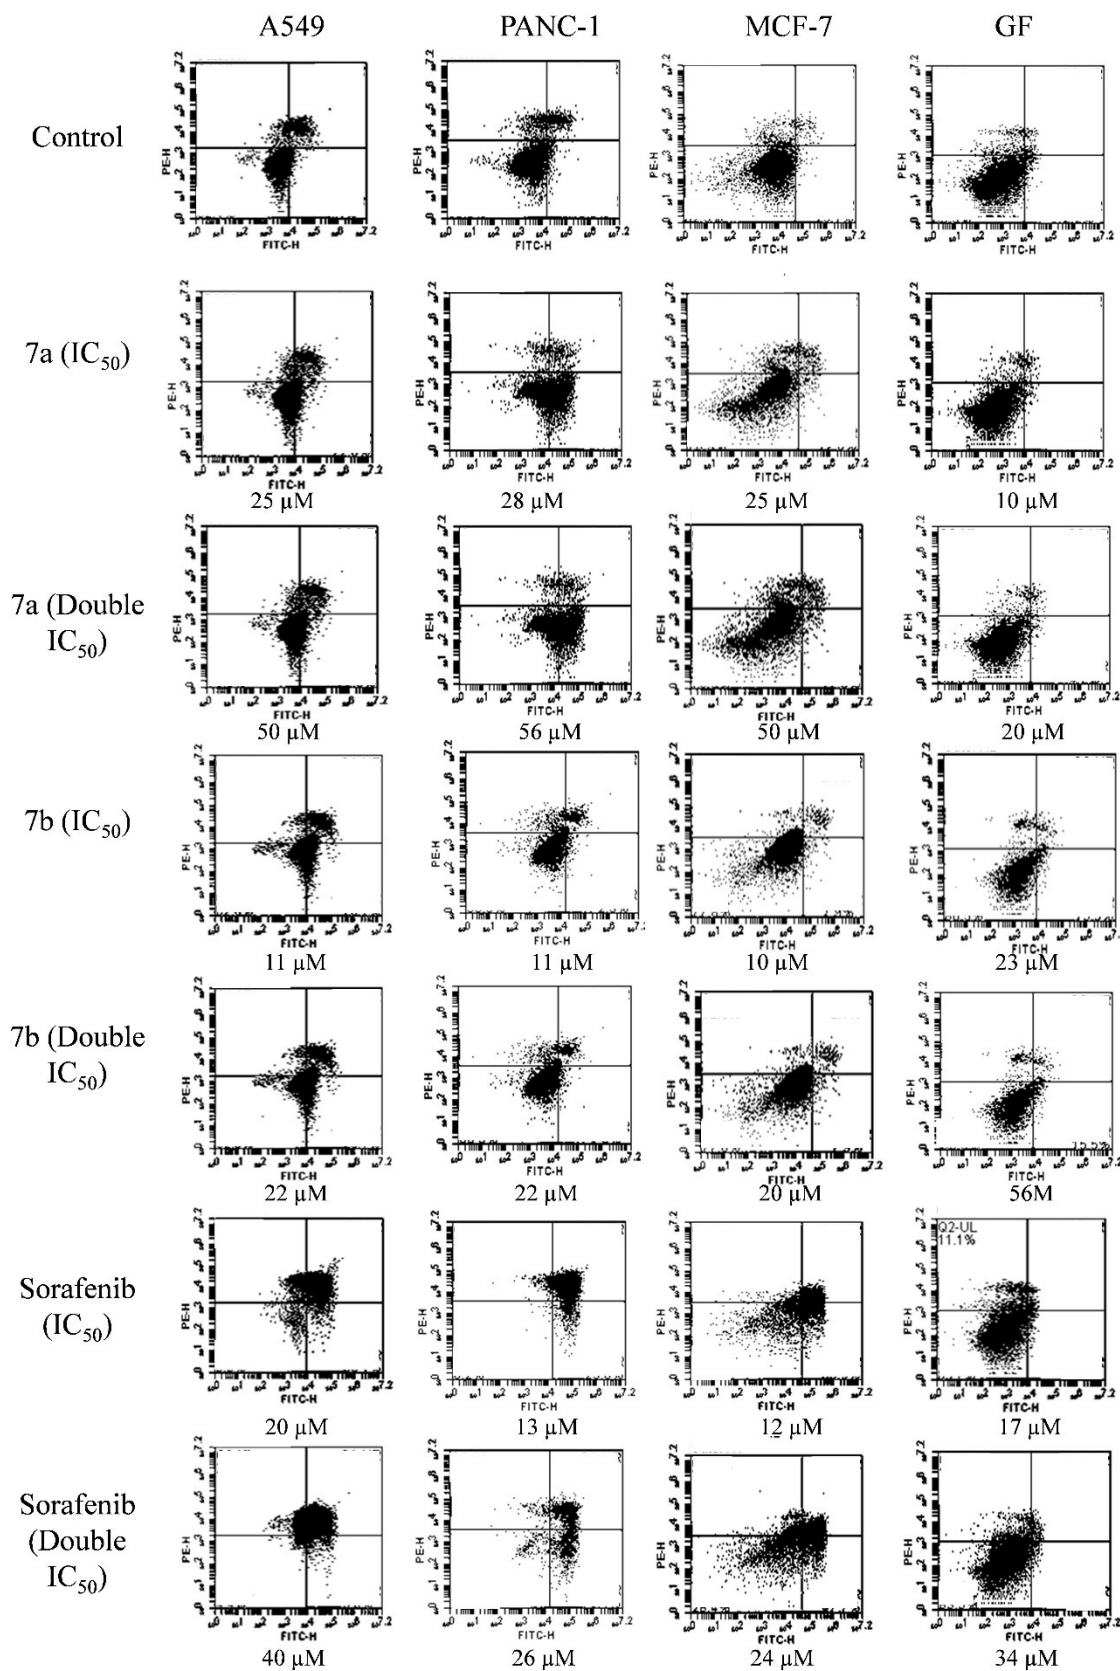

FigS2: Flow cytometry dot plots of A549, PANC-1, MCF-7, and GF cell lines treated with  $IC_{50}$  and double the  $IC_{50}$  of compound **7a**, **7b**, and Sorafenib for 72 hours compared to their respective negative untreated control. The quadrants (Q) represent the percentages of cells in the following order: Q1-upper left (UL): necrotic, Q1-upper right (UR) and lower right (LR): apoptosis, and Q1-lower left (LL): healthy cells.

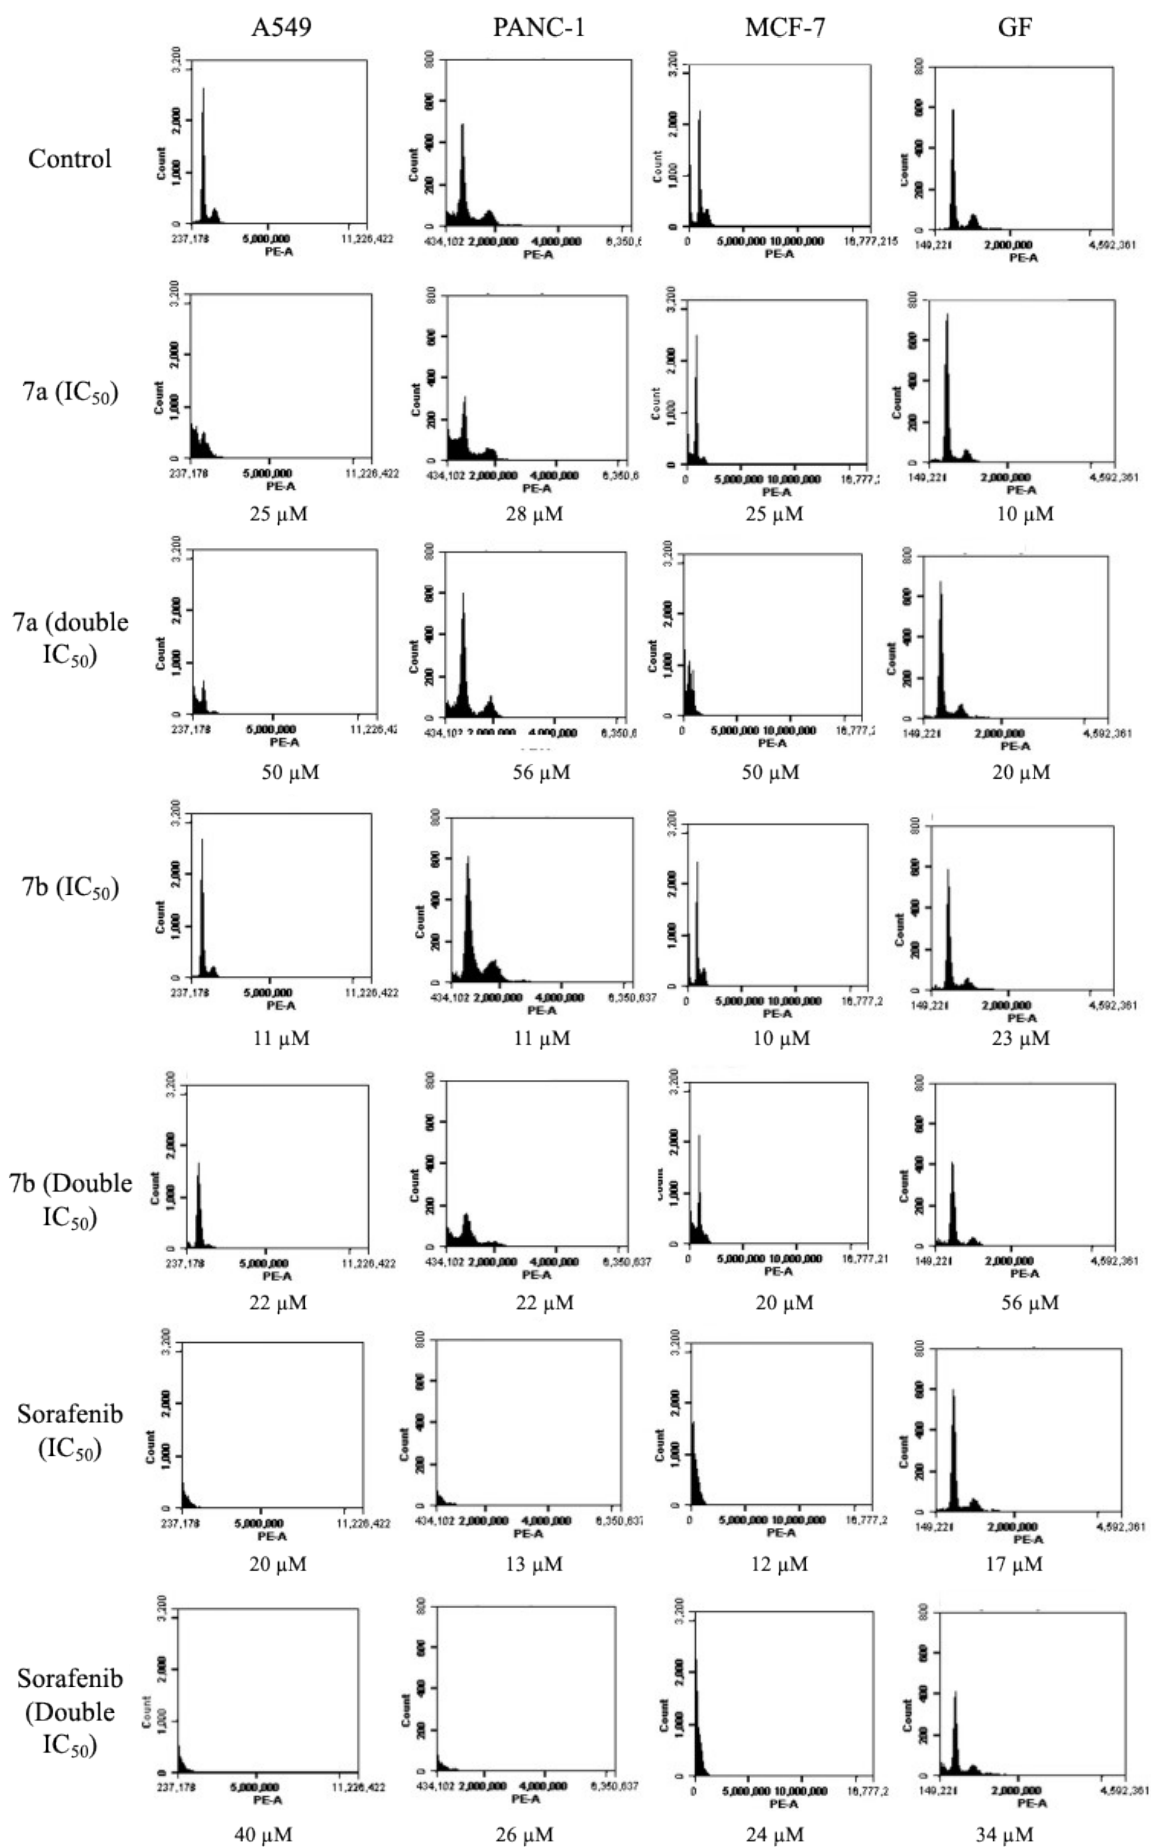

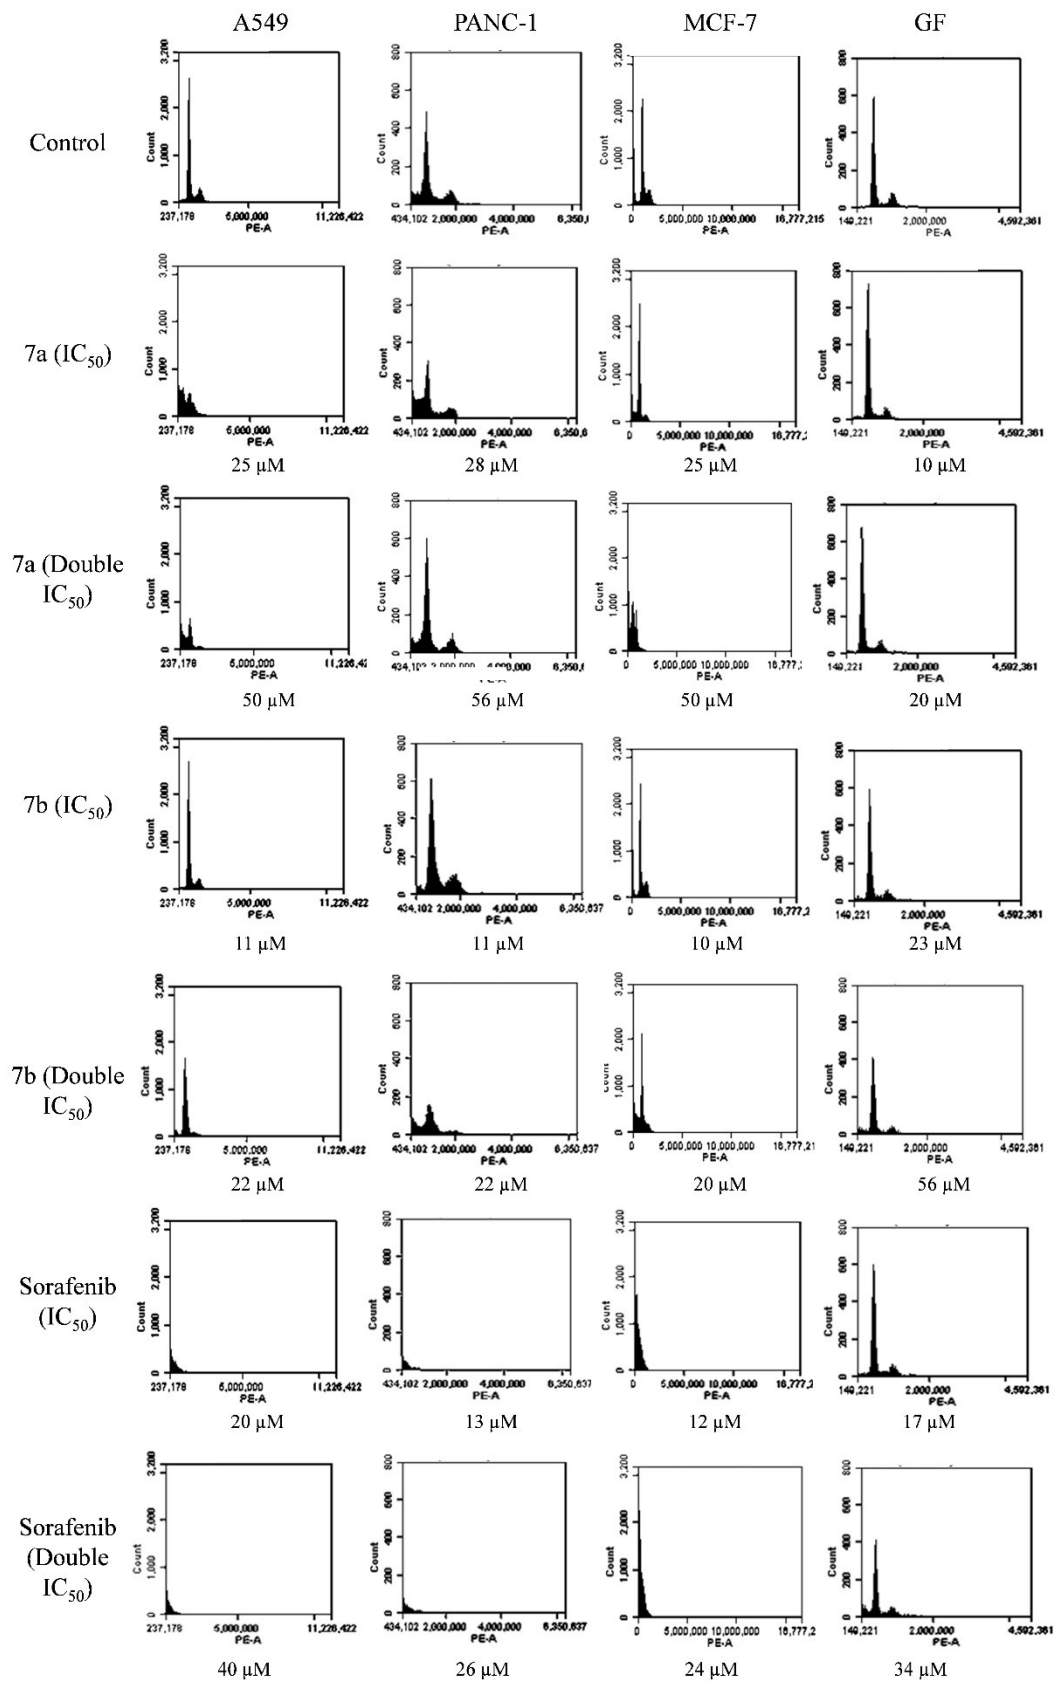

Fig.S3: Flow cytometry histogram of cell cycle analysis of A549, PANC-1, MCF-7, and GF cell lines treated with  $IC_{50}$  and double the  $IC_{50}$  of compound **7a**, **7b**, and Sorafenib for 72 hours.
